# Supplementary material for: Protein-Bound Uremic Toxins in Hemodialysis Patients Relate to Residual Kidney Function, Are Not Influenced by Convective Transport, and Do Not Relate to Outcome
Source: MDPI journal article supplement (doi:10.3390/toxins12040234), 2020-04-07
Supplement: s1 [file s1]

# Supplementary Materials: Protein-Bound Uremic Toxins in Hemodialysis Patients Relate to Residual Kidney Function, are Not Influenced by Convective Transport, and Do Not Relate to Outcome

**Maaïke K. van Gelder, Igor R. Middel, Robin W.M. Vernooij, Michiel L. Bots, Marianne C. Verhaar, Rosalinde Masereeuw, Muriel P. Grooteman, Menso J. Nubé, M. A. van den Dorpel, Peter J. Blankestijn, Maarten B. Rookmaaker and Karin G.F. Gerritsen**

## Concise Methods for PBUT Measurement

### *Chemicals and Reagents*

Kynurine, kynurenic acid, indoxyl sulfate (IS), indole-3-acetic acid (IAA), hippuric acid (HA), acetic acid (HAc; LC-MS grade) and dimethyl sulfoxide (DMSO; 99.9%) were purchased from Sigma-Aldrich (St. Louis, MO, USA). p-Cresyl sulfate p-Cresyl glucuronide and were purchased from AlsaChim (Illkirch-Graffenstaden, France). Acetonitrile (ACN; LC-MS grade) was obtained from Biosolve BV (Valkenswaard, the Netherlands). The isotopically labeled internal standards d<sub>4</sub>-kynurenine, d<sub>5</sub>-kynurenic acid and d<sub>5</sub>-indole-3-acetic acid were obtained from CDN Isotopes (Pointe-Claire, Quebec, Canada), <sup>13</sup>C<sub>6</sub>-indoxyl sulfate and d<sub>5</sub>-hippuric acid and were purchased from Cambridge Isotope Laboratories (Andover, MA, USA), d<sub>7</sub>-p-cresyl sulfate (potassium salt) was purchased from IsoSciences (Ambler, PA, USA) and d<sub>7</sub>-p-cresyl glucuronide was purchased from Toronto Research Chemicals (North York, Ontario, Canada). Ultra-pure water (Synergy® Water Purification System) was used to prepare all aqueous solutions, dilutions, and eluents.

### *Sample Work-Up*

Plasma samples were processed prior to LC-MS analysis. A 100-μL sample (plasma or surrogate matrix) was pipetted into a 1-mL 96-well plate. Phosphate-buffered saline (pH 7.4) was used as a surrogate matrix for calibration curve and quality control samples. Plasma samples were diluted by addition of 50 μL of water. For calibration curve and quality control samples, the 50-μL water sample contained the standards. Subsequently, 400 μL of cold (4 °C) ACN with internal standards d<sub>4</sub>-kynurenine (1 μmol/L), d<sub>5</sub>-kynurenic acid (0.5 μmol/L), <sup>13</sup>C<sub>6</sub>-indoxyl sulfate (2 μmol/L), d<sub>5</sub>-indole-3-acetic acid (2 μmol/L), d<sub>7</sub>-p-cresyl sulfate (2 μmol/L), d<sub>7</sub>-p-cresyl glucuronide (2 μmol/L) and d<sub>5</sub>-hippuric acid (2 μmol/L) was added. Samples were vortexed for 5 minutes on a plate vortexer and centrifuged for 5 minutes 2643 RCF. A 400-μL sample of the supernatant was transferred to a new plate and dried under a nitrogen flow at 40°C. The residue was reconstituted in 280 μL of water and centrifuged again for 5 minutes at 2643 RCF. An 80-μL sample was transferred into a 96-well plate of which 7.5 μL was injected for UHPLC-MS analysis.

### *Liquid Chromatography-Mass Spectrometry*

A 1290 Infinity UHPLC system (Agilent Technologies, Waldbronn, BW, Germany) coupled to an Agilent 6560 ion mobility quadrupole time-of-flight mass spectrometer (IM-QToF) was used. A Waters ACQUITY UPLC HSS T3 column (100 mm × 2.1 mm, 1.8 μm particles) combined with an ACQUITY UPLC HSS T3 VanGuard pre-column (5 mm × 2.1 mm, 1.8 μm particles) was used and was kept at a temperature of 40 °C. Mixed isocratic and gradient elution at a flow rate of 0.35 mL/min was applied for analyte separation. In the mobile phase, solvent A consisted of 10 mmol/L HAc, and solvent B was ACN. The final method was an initial isocratic composition of 5% B held for 1 min, followed by a linear increase

to 15% B in 1 min, and to 20% B in another 1 min. Then, B was increased linearly to 100% over 2 min, and was held at 100% for 0.5 min to flush the column. To re-equilibrate, B was reduced back to the initial isocratic composition of 5% over 1.5 min and was held for 4 min. The MS settings were ionization, capillary and nozzle voltage, nebulizing and drying gas flow and temperature, and the tuned mass range (Table S1).

**Table S1.** LC-MS parameters for the quantification of PBUTs.

| PBUT / Internal Standard                      | Parent Ion (m/z)     | Fragment Ion (m/z)   | Retention Time (min) | LLOQ (μmol/L) | ULOQ (μmol/L) |
|-----------------------------------------------|----------------------|----------------------|----------------------|---------------|---------------|
| Kynurenine                                    | 207.08               | <b><u>144.04</u></b> | 2.1                  | 1.0           | 20            |
| d4-kynurenine                                 | 211.12               | <b><u>148.07</u></b> | 2.1                  |               |               |
| Kynurenic acid                                | 188.03               | <b><u>144.04</u></b> | 3.2                  | 0.10          | 5.0           |
| d5-kynurenic acid                             | 193.06               | <b><u>149.08</u></b> | 3.2                  |               |               |
| Indoxyl sulfate                               | <b><u>212.00</u></b> |                      | 4.5                  | 0.4           | 400           |
| <sup>13</sup> C <sub>6</sub> -indoxyl sulfate | <b><u>218.02</u></b> |                      | 4.5                  |               |               |
| Indole-3-acetic acid                          | 174.05               | <b><u>144.04</u></b> | 5.8                  | 0.5           | 50            |
| d5- indole-3-acetic acid                      | 179.09               | <b><u>149.08</u></b> | 5.8                  |               |               |
| P-cresyl sulfate                              | <b><u>187.00</u></b> |                      | 5.8                  | 4             | 700           |
| d7-p-cresyl sulfate                           | <b><u>194.05</u></b> |                      | 5.8                  |               |               |
| P-cresyl glucuronide                          | <b><u>283.08</u></b> |                      | 4.6                  | 0.1           | 100           |
| d7-p-cresyl glucuronide                       | <b><u>290.13</u></b> |                      | 4.6                  |               |               |
| Hippuric acid                                 | <b><u>178.05</u></b> |                      | 3.9                  | 1.0           | 1000          |
| d5-hippuric acid                              | <b><u>183.08</u></b> |                      | 3.9                  |               |               |

All analytes were measured in negative mode. Kynurenine, kynurenic acid and indole-3-acetic acid ions underwent major MS-fragmentation. Bold, underlined masses indicate the ions used for quantification for the respective analyte. LLOQ, lower limit of quantification; ULOQ, upper limit of quantification.

**Table S2.** Association between patient characteristics and protein bound uremic toxin concentrations at baseline corrected for normalized protein nitrogen appearance.

|                   | Kynurenine (μmol/L)* | Kynurenic Acid (μmol/L)*  | Indoxyl Sulfate (μmol/L)*  | Indole-3-Acetic Acid (μmol/L)* | p-Cresyl Sulfate Tertiles† | p-Cresyl Glucuronide (μmol/L)* | Hippuric Acid (μmol/L)*  |
|-------------------|----------------------|---------------------------|----------------------------|--------------------------------|----------------------------|--------------------------------|--------------------------|
| Characteristic    | β (p)                | β (p)                     | β (p)                      | e <sup>β</sup> (p)             | e <sup>β</sup> (p)         | e <sup>β</sup> (p)             | e <sup>β</sup> (p)       |
| Age (years)       | -0.006 (0.597)       | -0.012 (0.132)            | 0.116 (0.831)              | 0.999 (0.822)                  | 1.012 (0.476)              | 1.005 (0.635)                  | 1.000 (0.989)            |
| Gender (male = 1) | 0.009 (0.979)        | <b>0.445 (0.043)</b>      | 6.787 (0.658)              | <b>1.473 (0.017)</b>           | 1.850 (0.196)              | 0.668 (0.210)                  | 1.072 (0.696)            |
| Renal creatinine  | 0.013 (0.800)        | <b>-0.198 (&lt;0.001)</b> | <b>-11.139 (&lt;0.001)</b> | 0.960 (0.106)                  | 1.066 (0.400)              | <b>0.903 (0.043)</b>           | <b>0.843 (&lt;0.001)</b> |

|                                           |                |                          |                        |                      |                      |               |                      |
|-------------------------------------------|----------------|--------------------------|------------------------|----------------------|----------------------|---------------|----------------------|
| clearance<br>(mL/min/1.73m <sup>2</sup> ) |                |                          |                        |                      |                      |               |                      |
| nPNA (g/kg/d)                             | -1.579 (0.055) | <b>2.367 (&lt;0.001)</b> | <b>110.005 (0.005)</b> | 0.852 (0.687)        | 5.094 (0.169)        | 2.572 (0.236) | 1.891 (0.148)        |
| Dialysis<br>vintage (years)               | -0.101 (0.093) | 0.009 (0.827)            | 0.130 (0.963)          | <b>0.949 (0.049)</b> | 1.113 (0.234)        | 1.072 (0.237) | 1.000 (0.999)        |
| Albumin (g/L)                             | 0.030 (0.516)  | 0.040 (0.184)            | 0.227 (0.916)          | <b>1.057 (0.024)</b> | <b>1.179 (0.018)</b> | 1.065 (0.157) | 1.026 (0.301)        |
| Beta blocker (yes =<br>1)                 | 0.501 (0.131)  | 0.238 (0.273)            | 8.099 (0.600)          | 0.924 (0.620)        | 1.322 (0.553)        | 0.888 (0.713) | 1.086 (0.643)        |
| Calcium<br>antagonist (yes =<br>1)        | 0.155 (0.657)  | -0.136 (0.553)           | -20.643 (0.200)        | 1.168 (0.362)        | 0.940 (0.900)        | 0.687 (0.267) | 0.754 (0.136)        |
| ACE-inhibitor<br>(yes = 1)                | -0.329 (0.363) | -0.325 (0.159)           | <b>31.824 (0.049)</b>  | 0.781 (0.136)        | 0.643 (0.379)        | 1.457 (0.274) | 0.861 (0.434)        |
| ARB (yes = 1)                             | 0.167 (0.690)  | 0.435 (0.110)            | -27.416 (0.155)        | 1.028 (0.885)        | 2.067 (0.228)        | 0.661 (0.309) | <b>1.657 (0.021)</b> |
| Statin (yes = 1)                          | 0.172 (0.624)  | 0.137 (0.549)            | 3.524 (0.828)          | 0.807 (0.193)        | 1.080 (0.874)        | 0.952 (0.884) | 0.825 (0.297)        |
| Furosemide (yes =<br>1)                   | 0.369 (0.313)  | <b>-0.573 (0.014)</b>    | -10.800 (0.524)        | 1.132 (0.490)        | 2.306 (0.109)        | 0.670 (0.259) | 1.105 (0.609)        |
| Systolic blood<br>pressure<br>(mmHg)      | 0.002 (0.786)  | 0.010 (0.078)            | -0.326 (0.407)         | 0.998 (0.655)        | 0.992 (0.489)        | 1.004 (0.601) | 1.001 (0.754)        |
| Diastolic blood<br>pressure<br>(mmHg)     | -0.002 (0.876) | 0.014 (0.156)            | 0.822 (0.246)          | 0.996 (0.632)        | 1.018 (0.405)        | 1.017 (0.260) | 1.013 (0.104)        |
| Pulse pressure<br>(mmHg)                  | 0.005 (0.659)  | 0.008 (0.236)            | -0.871 (0.068)         | 0.999 (0.832)        | 0.980 (0.173)        | 0.999 (0.904) | 0.996 (0.483)        |
| History of CVD<br>(yes = 1)               | 0.180 (0.616)  | 0.030 (0.897)            | 16.841 (0.307)         | 1.005 (0.975)        | 2.291 (0.105)        | 0.754 (0.414) | 0.700 (0.060)        |
| Diabetes mellitus<br>(yes = 1)            | 0.357 (0.412)  | 0.432 (0.127)            | 26.225 (0.191)         | 0.801 (0.347)        | 1.431 (0.563)        | 0.716 (0.429) | 1.523 (0.072)        |
| HsCRP (mg/L)                              | 0.001 (0.916)  | -0.011 (0.085)           | 3.396 (0.376)          | 1.000 (0.991)        | 0.973 (0.082)        | 0.995 (0.547) | 0.997 (0.513)        |

ACE-inhibitor, angiotensin-converting enzyme inhibitor; ARB, angiotensin II receptor blocker; CVD, cardiovascular disease; HsCRP, high-sensitivity C-reactive protein; nPNA, normalized protein nitrogen appearance. \*Multivariate linear regression analysis with adjustment for age, gender, renal creatinine clearance and normalized protein nitrogen appearance. Data are expressed as the unstandardized beta regression coefficient ( $\beta$ ) with  $p$ -value. The plasma concentration of kynurenine, kynurenic acid and indoxyl sulfate will increase with  $\beta$ , and the plasma concentration of indole-3-acetic acid, p-cresyl glucuronide and hippuric acid, will be multiplied by  $e^\beta$  if the variable increases by 1 unit or if the variable changes from 0 to 1 for a dichotomous variable. \*Ordinal logistic regression analysis with adjustment for age, gender and creatinine clearance for p-cresyl sulfate tertiles (tertile 1: <337  $\mu\text{mol/L}$ , tertile 2: 337–701  $\mu\text{mol/L}$ , tertile 3: >701  $\mu\text{mol/L}$ ). Data are expressed as  $e^\beta$  with  $p$ -value which denotes the odds of having a plasma concentration in a higher tertile if the variable increases by 1 unit or changes from 0 to 1 for a dichotomous variable. Significant associations are shown in bold font.

**Table S3.** Association between medications and protein bound uremic toxin concentrations at baseline stratified for residual kidney function.

|                                             | Kynurenine<br>( $\mu\text{mol/L}$ ) <sup>*</sup> | Kynurenic<br>acid<br>( $\mu\text{mol/L}$ ) <sup>*</sup> | Indoxyl<br>sulfate<br>( $\mu\text{mol/L}$ ) <sup>*</sup> | Indole-3-<br>acetic acid<br>( $\mu\text{mol/L}$ ) <sup>*</sup> | p-Cresyl<br>sulfate<br>tertiles <sup>†</sup> | p-Cresyl<br>glucuronide<br>( $\mu\text{mol/L}$ ) <sup>*</sup> | Hippuric acid<br>( $\mu\text{mol/L}$ ) <sup>*</sup> |
|---------------------------------------------|--------------------------------------------------|---------------------------------------------------------|----------------------------------------------------------|----------------------------------------------------------------|----------------------------------------------|---------------------------------------------------------------|-----------------------------------------------------|
| Characteristic                              | $\beta$ ( <i>p</i> )                             | $\beta$ ( <i>p</i> )                                    | $\beta$ ( <i>p</i> )                                     | $e^{\beta}$ ( <i>p</i> )                                       | $e^{\beta}$ ( <i>p</i> )                     | $e^{\beta}$ ( <i>p</i> )                                      | $e^{\beta}$ ( <i>p</i> )                            |
| <b>Patients without RKF (<i>n</i> = 36)</b> |                                                  |                                                         |                                                          |                                                                |                                              |                                                               |                                                     |
| Albumin (g/L)                               | 0.032 (0.059)                                    | 0.048 (0.306)                                           | -1.428 (0.637)                                           | 1.049 (0.208)                                                  | <b>1.275 (0.010)</b>                         | 0.096 (0.387)                                                 | 1.021 (0.503)                                       |
| Beta blocker (yes = 1)                      | 0.369 (0.373)                                    | 0.227 (0.557)                                           | 0.152 (0.050)                                            | 0.712 (0.190)                                                  | 1.714 (0.396)                                | 1.271 (0.623)                                                 | 1.043 (0.863)                                       |
| Calcium antagonist (yes = 1)                | 0.106 (0.810)                                    | -0.137 (0.738)                                          | 2.347 (0.928)                                            | 0.896 (0.702)                                                  | 0.617 (0.468)                                | 1.096 (0.859)                                                 | 0.755 (0.330)                                       |
| ACE-inhibitor (yes = 1)                     | -0.191 (0.692)                                   | -0.612 (0.165)                                          | 24.820 (0.383)                                           | 0.652 (0.125)                                                  | 0.794 (0.751)                                | 1.726 (0.330)                                                 | 0.811 (0.459)                                       |
| ARB (yes = 1)                               | -0.062 (0.910)                                   | <b>1.066 (0.030)</b>                                    | -17.380 (0.592)                                          | 1.174 (0.642)                                                  | 0.484 (0.385)                                | 1.691 (0.410)                                                 | 1.570 (0.157)                                       |
| Statin (yes = 1)                            | -0.225 (0.602)                                   | 0.404 (0.309)                                           | -3.567 (0.889)                                           | <b>0.571 (0.029)</b>                                           | 0.773 (0.692)                                | 1.112 (0.833)                                                 | 0.970 (0.902)                                       |
| Furosemide (yes = 1)                        | 0.644 (0.178)                                    | -0.395 (0.357)                                          | -40.283 (0.154)                                          | 1.350 (0.642)                                                  | 2.417 (0.239)                                | 0.530 (0.258)                                                 | 1.435 (0.187)                                       |
| <b>Patients with RKF (<i>n</i> = 42)</b>    |                                                  |                                                         |                                                          |                                                                |                                              |                                                               |                                                     |
| Albumin (g/L)                               | -0.001 (0.989)                                   | 0.073 (0.205)                                           | 3.436 (0.299)                                            | 1.021 (0.584)                                                  | 1.259 (0.050)                                | 1.047 (0.508)                                                 | <b>1.017 (0.010)</b>                                |
| Beta blocker (yes = 1)                      | 0.324 (0.466)                                    | <b>0.648 (0.048)</b>                                    | 26.075 (0.168)                                           | 1.264 (0.261)                                                  | 1.337 (0.832)                                | 0.598 (0.190)                                                 | 1.334 (0.265)                                       |
| Calcium antagonist (yes = 1)                | -0.003 (0.995)                                   | 0.145 (0.668)                                           | -28.647 (0.133)                                          | 1.360 (0.132)                                                  | 1.688 (0.322)                                | <b>0.432 (0.031)</b>                                          | 0.720 (0.209)                                       |
| ACE-inhibitor (yes = 1)                     | -0.169 (0.707)                                   | -0.517 (0.108)                                          | 7.709 (0.685)                                            | 0.775 (0.258)                                                  | 0.741 (0.799)                                | 1.097 (0.815)                                                 | 0.822 (0.448)                                       |
| ARB (yes = 1)                               | -0.075 (0.878)                                   | 0.453 (0.205)                                           | -21.312 (0.307)                                          | 1.017 (0.938)                                                  | 3.151 (0.072)                                | 0.462 (0.069)                                                 | 1.273 (0.398)                                       |
| Statin (yes = 1)                            | 0.346 (0.437)                                    | 0.048 (0.888)                                           | 3.586 (0.853)                                            | 0.894 (0.597)                                                  | 1.170 (0.984)                                | 0.900 (0.792)                                                 | 0.644 (0.088)                                       |
| Furosemide (yes = 1)                        | 0.173 (0.724)                                    | <b>-0.856 (0.008)</b>                                   | 5.689 (0.788)                                            | 0.793 (0.358)                                                  | 1.486 (0.437)                                | 0.910 (0.829)                                                 | 0.937 (0.822)                                       |

ACE-inhibitor, angiotensin-converting enzyme inhibitor; ARB, angiotensin II receptor blocker; CVD, cardiovascular disease; HsCRP, high-sensitivity C-reactive protein; nPNA, normalized protein nitrogen appearance. \*Multivariate linear regression analysis with adjustment for age, gender and renal creatinine clearance. Data are expressed as the unstandardized beta regression coefficient ( $\beta$ ) with *p*-value. The plasma concentration of kynurenine, kynurenic acid and indoxyl sulfate will increase with  $\beta$ , and the plasma concentration of hippuric acid, p-Cresyl glucuronide and indole-3-acetic acid will be multiplied by  $e^{\beta}$  if the variable increases by 1 unit or if the variable changes from 0 to 1 for a dichotomous variable. <sup>†</sup>Ordinal logistic regression analysis with adjustment for age, gender and creatinine clearance for p-Cresyl sulfate tertiles (tertile 1: <337  $\mu\text{mol/L}$ , tertile 2: 337–694  $\mu\text{mol/L}$ , tertile 3: >694  $\mu\text{mol/L}$ ). Data are expressed

as  $e^{\beta}$  with  $p$ -value which denotes the odds of having a plasma concentration in a higher tertile if the variable increases by 1 unit or changes from 0 to 1 for a dichotomous variable. Significant associations are shown in bold font.

**Table S4.** Hazard ratios for all-cause mortality and new cardiovascular events for PBUT tertiles at baseline.

| PBUT tertiles*       | Outcome             | N  | # Events | Hazard ratio (95% CI)  |       |                        |       |
|----------------------|---------------------|----|----------|------------------------|-------|------------------------|-------|
|                      |                     |    |          | Model I                | P     | Model II               | P     |
| Kynurenine           | All-cause mortality | 79 | 34       | 1.105 (0.736 to 1.658) | 0.631 | 0.943 (0.615 to 1.445) | 0.786 |
|                      | CV events           | 78 | 29       | 1.172 (0.750 to 1.833) | 0.486 | 1.070 (0.637 to 1.797) | 0.797 |
| Kynurenic acid       | All-cause mortality | 80 | 35       | 0.754 (0.490 to 1.160) | 0.200 | 0.720 (0.399 to 1.297) | 0.274 |
|                      | CV events           | 79 | 29       | 0.861 (0.535 to 1.384) | 0.536 | 1.492 (0.739 to 3.014) | 0.265 |
| Indoxyl sulfate      | All-cause mortality | 80 | 35       | 0.890 (0.582 to 1.360) | 0.590 | 0.950 (0.541 to 1.669) | 0.858 |
|                      | CV events           | 79 | 29       | 1.097 (0.692 to 1.738) | 0.693 | 1.510 (0.761 to 2.995) | 0.239 |
| Indole-3-acetic acid | All-cause mortality | 60 | 24       | 1.146 (0.690 to 1.904) | 0.599 | 1.220 (0.623 to 2.389) | 0.563 |
|                      | CV events           | 59 | 20       | 1.360 (0.789 to 2.344) | 0.268 | 2.304 (0.980 to 5.416) | 0.056 |
| p-Cresyl sulfate     | All-cause mortality | 80 | 35       | 1.107 (0.732 to 1.674) | 0.629 | 1.034 (0.643 to 1.663) | 0.891 |
|                      | CV events           | 79 | 29       | 0.886 (0.567 to 1.386) | 0.597 | 0.844 (0.491 to 1.451) | 0.540 |
| p-Cresyl glucuronide | All-cause mortality | 80 | 35       | 1.137 (0.739 to 1.749) | 0.560 | 1.044 (0.653 to 1.669) | 0.858 |
|                      | CV events           | 79 | 29       | 1.035 (0.651 to 1.645) | 0.883 | 1.235 (0.738 to 2.067) | 0.421 |
| Hippuric acid        | All-cause mortality | 78 | 33       | 0.950 (0.621 to 1.456) | 0.815 | 0.895 (0.542 to 1.478) | 0.665 |
|                      | CV events           | 77 | 28       | 0.881 (0.554 to 1.401) | 0.592 | 1.023 (0.564 to 1.855) | 0.940 |

Uni/Multivariate Cox proportional hazards regression analysis censored for kidney transplantation. Model I: univariate; model II: adjustment for age, gender, diabetes mellitus, history of cardiovascular disease, renal creatinine clearance and normalized protein nitrogen appearance. Data are expressed as hazard ratios with 95% confidence interval (CI) and  $p$ -value for the occurrence of new cardiovascular (CV) events and all-cause mortality associated with a PBUT plasma concentration in a higher tertile. \*PBUT plasma concentrations were divided into tertiles of kynurenine (<3.6, 3.6–4.9 and >4.9  $\mu\text{mol/L}$ ), kynurenic acid (<1.5, 1.5–2.5 and >2.5  $\mu\text{mol/L}$ ), indoxyl sulfate (<123, 123–180 and >180  $\mu\text{mol/L}$ ), indole-3-acetic acid (<5.9,

5.9–9.2 and >9.2  $\mu\text{mol/L}$ ), p-cresyl sulfate (<337, 337–701 and >701  $\mu\text{mol/L}$ ), p-cresyl glucuronide (<5.1, 5.1–20.5 and >20.5  $\mu\text{mol/L}$ ), and hippuric acid (<141, 141–273 and >273  $\mu\text{mol/L}$ ).

**Table S5.** Hazard ratios for all-cause mortality and new cardiovascular events for PBUT plasma concentrations at follow up.

| PBUT                                       | Outcome             | N  | # Events | Hazard ratio (95% CI)  |       |                        |       |
|--------------------------------------------|---------------------|----|----------|------------------------|-------|------------------------|-------|
|                                            |                     |    |          | Model I                | P     | Model II               | P     |
| Kynurenine ( $\mu\text{mol/L}$ )           | All-cause mortality | 74 | 33       | 0.891 (0.653 to 1.215) | 0.464 | 0.822 (0.553 to 1.222) | 0.322 |
|                                            | CV events           | 74 | 27       | 0.866 (0.626 to 1.199) | 0.387 | 0.735 (0.456 to 1.185) | 0.206 |
| Kynurenic acid ( $\mu\text{mol/L}$ )       | All-cause mortality | 74 | 33       | 0.854 (0.628 to 1.162) | 0.315 | 0.867 (0.527 to 1.426) | 0.574 |
|                                            | CV events           | 74 | 27       | 0.713 (0.495 to 1.026) | 0.068 | 0.710 (0.414 to 1.218) | 0.214 |
| Indoxyl sulfate ( $\mu\text{mol/L}$ )      | All-cause mortality | 74 | 33       | 1.003 (0.999 to 1.007) | 0.143 | 1.003 (0.997 to 1.008) | 0.309 |
|                                            | CV events           | 74 | 27       | 1.000 (0.995 to 1.005) | 0.964 | 0.998 (0.991 to 1.005) | 0.525 |
| Indole-3-acetic acid ( $\mu\text{mol/L}$ ) | All-cause mortality | 52 | 22       | 0.844 (0.408 to 1.744) | 0.647 | 0.907 (0.406 to 2.027) | 0.812 |
|                                            | CV events           | 52 | 21       | 1.033 (0.524 to 2.034) | 0.926 | 1.017 (0.492 to 2.102) | 0.964 |
| p-Cresyl sulfate ( $\mu\text{mol/L}$ )     | All-cause mortality | 74 | 33       | 0.952 (0.709 to 1.278) | 0.742 | 0.905 (0.659 to 1.245) | 0.540 |
|                                            | CV events           | 74 | 27       | 0.873 (0.650 to 1.174) | 0.369 | 0.850 (0.595 to 1.213) | 0.370 |
| p-Cresyl glucuronide ( $\mu\text{mol/L}$ ) | All-cause mortality | 74 | 33       | 1.017 (0.817 to 1.268) | 0.878 | 1.048 (0.835 to 1.314) | 0.686 |
|                                            | CV events           | 74 | 27       | 0.941 (0.759 to 1.167) | 0.580 | 1.035 (0.818 to 1.310) | 0.776 |
| Hippuric acid ( $\mu\text{mol/L}$ )        | All-cause mortality | 74 | 33       | 1.219 (0.858 to 1.733) | 0.268 | 1.107 (0.713 to 1.720) | 0.651 |
|                                            | CV events           | 74 | 27       | 0.761 (0.522 to 1.109) | 0.155 | 0.855 (0.522 to 1.400) | 0.533 |

Uni/Multivariate Cox proportional hazards regression analysis censored for kidney transplantation. Model I: univariate; model II: adjustment for age, gender, diabetes mellitus, history of cardiovascular disease, renal creatinine clearance and normalized protein nitrogen appearance. Data are expressed as hazard ratios with 95% confidence interval (CI) and *p*-value for the occurrence of new cardiovascular (CV) events and all-cause mortality associated with a one-unit increase in PBUT plasma concentration.

**Table S6.** Hazard ratios for all-cause mortality and new cardiovascular events for PBUT tertiles at follow up.

| PBUT tertiles*       | Outcome             | N  | # Events | Hazard ratio (95% CI)  |       |                        |              |
|----------------------|---------------------|----|----------|------------------------|-------|------------------------|--------------|
|                      |                     |    |          | Model I                | P     | Model II               | P            |
| Kynurenine           | All-cause mortality | 74 | 36       | 0.756 (0.488 to 1.173) | 0.212 | 0.687 (0.412 to 1.147) | 0.151        |
|                      | CV events           | 74 | 30       | 0.735 (0.461 to 1.173) | 0.197 | 0.557 (0.312 to 0.995) | 0.048        |
| Kynurenic acid       | All-cause mortality | 74 | 36       | 0.686 (0.441 to 1.065) | 0.093 | 0.607 (0.333 to 1.106) | 0.103        |
|                      | CV events           | 74 | 30       | 0.619 (0.377 to 1.016) | 0.058 | 0.674 (0.345 to 1.316) | 0.248        |
| Indoxyl sulfate      | All-cause mortality | 74 | 36       | 1.337 (0.878 to 2.037) | 0.176 | 1.281 (0.726 to 2.261) | 0.393        |
|                      | CV events           | 74 | 30       | 1.373 (0.856 to 2.202) | 0.188 | 1.408 (0.671 to 2.958) | 0.366        |
| Indole-3-acetic acid | All-cause mortality | 52 | 24       | 0.874 (0.517 to 1.475) | 0.613 | 0.874 (0.480 to 1.589) | 0.658        |
|                      | CV events           | 52 | 24       | 1.048 (0.616 to 1.782) | 0.863 | 1.236 (0.637 to 2.398) | 0.530        |
| p-Cresyl sulfate     | All-cause mortality | 74 | 36       | 0.986 (0.643 to 1.512) | 0.949 | 0.861 (0.548 to 1.352) | 0.515        |
|                      | CV events           | 74 | 30       | 0.659 (0.409 to 1.060) | 0.086 | 0.552 (0.326 to 0.935) | <b>0.027</b> |
| p-Cresyl glucuronide | All-cause mortality | 74 | 36       | 0.992 (0.636 to 1.546) | 0.972 | 1.092 (0.656 to 1.815) | 0.736        |
|                      | CV events           | 74 | 30       | 0.790 (0.488 to 1.277) | 0.336 | 0.925 (0.527 to 1.625) | 0.787        |
| Hippuric acid        | All-cause mortality | 74 | 36       | 1.102 (0.729 to 1.665) | 0.646 | 0.919 (0.585 to 1.445) | 0.715        |
|                      | CV events           | 74 | 30       | 0.678 (0.423 to 1.086) | 0.106 | 0.708 (0.413 to 1.215) | 0.210        |

Uni/Multivariate Cox proportional hazards regression analysis censored for kidney transplantation. Model I: univariate; model II: adjustment for age, gender, diabetes mellitus, history of cardiovascular disease, renal creatinine clearance and and normalized protein nitrogen appearance. Data are expressed as hazard ratios with 95% confidence interval (CI) and *p*-value for the occurrence of new cardiovascular (CV) events and all-cause mortality associated with a PBUT plasma concentration in a higher tertile. Significant differences are shown in bold font.\*PBUT plasma concentrations were divided into tertiles of kynurenine (<3.5, 3.5–4.5 and >4.5  $\mu\text{mol/L}$ ), kynurenic acid (<1.7, 1.7–2.9 and >2.9  $\mu\text{mol/L}$ ), indoxyl sulfate (<115, 115–196 and >196  $\mu\text{mol/L}$ ), indole-3-acetic acid (<5.8, 5.8–9.0 and >9.0  $\mu\text{mol/L}$ ), p-cresyl sulfate (<336, <336–626 and >626  $\mu\text{mol/L}$ ), p-cresyl glucuronide (<5.3, 5.3–17.9 and >17.9  $\mu\text{mol/L}$ ), and hippuric acid (<101, 101–283 and >283  $\mu\text{mol/L}$ ).

**Table S7.** Hazard ratios for all-cause mortality and new cardiovascular events for the percentage change in PBUT plasma concentrations from baseline to follow up.

| $\Delta$ PBUT<br>(%change/6<br>months) | Outcome             | N  | # Events | Hazard ratio (95% CI)  |       |                        |              |
|----------------------------------------|---------------------|----|----------|------------------------|-------|------------------------|--------------|
|                                        |                     |    |          | Model I                | P     | Model II               | P            |
| Kynurenine                             | All-cause mortality | 41 | 32       | 0.991 (0.980 to 1.002) | 0.104 | 0.992 (0.980 to 1.005) | 0.225        |
|                                        | CV events           | 73 | 27       | 0.990 (0.978 to 1.002) | 0.107 | 0.987 (0.971 to 1.003) | 0.098        |
| Kynurenic acid                         | All-cause mortality | 74 | 33       | 0.996 (0.988 to 1.005) | 0.402 | 0.996 (0.987 to 1.006) | 0.484        |
|                                        | CV events           | 74 | 27       | 0.992 (0.982 to 1.002) | 0.102 | 0.988 (0.976 to 1.001) | 0.061        |
| Indoxyl sulfate                        | All-cause mortality | 74 | 33       | 0.999 (0.992 to 1.007) | 0.835 | 0.998 (0.988 to 1.007) | 0.623        |
|                                        | CV events           | 74 | 27       | 0.991 (0.982 to 1.002) | 0.065 | 0.983 (0.971 to 0.996) | <b>0.009</b> |
| Indole-3-acetic acid                   | All-cause mortality | 43 | 17       | 0.996 (0.987 to 1.005) | 0.377 | 0.995 (0.983 to 1.007) | 0.409        |
|                                        | CV events           | 43 | 16       | 1.001 (0.995 to 1.008) | 0.683 | 0.999 (0.993 to 1.006) | 0.842        |
| p-Cresyl sulfate                       | All-cause mortality | 74 | 33       | 0.999 (0.995 to 1.003) | 0.608 | 0.998 (0.990 to 1.006) | 0.627        |
|                                        | CV events           | 74 | 27       | 0.999 (0.993 to 1.003) | 0.458 | 0.992 (0.983 to 1.002) | 0.134        |
| p-Cresyl glucuronide                   | All-cause mortality | 74 | 33       | 1.000 (0.999 to 1.001) | 0.978 | 1.001 (0.998 to 1.004) | 0.385        |
|                                        | CV events           | 74 | 27       | 1.000 (0.998 to 1.001) | 0.732 | 0.999 (0.995 to 1.003) | 0.606        |
| Hippuric acid                          | All-cause mortality | 73 | 32       | 0.999 (0.996 to 1.003) | 0.709 | 0.999 (0.994 to 1.003) | 0.565        |
|                                        | CV events           | 73 | 27       | 0.999 (0.995 to 1.003) | 0.491 | 0.999 (0.994 to 1.004) | 0.693        |

Uni/Multivariate Cox proportional hazards regression analysis censored for kidney transplantation. Model I: univariate; model II: adjustment for age, gender, diabetes mellitus, history of cardiovascular disease, renal creatinine clearance and normalized protein nitrogen appearance. Data are expressed as hazard ratios with 95% confidence interval (CI) and *p*-value for the occurrence of new cardiovascular (CV) events and all-cause mortality associated with an increase in the percentage change in PBUT plasma concentration from baseline to six months ( $\Delta$  PBUT, %change/6 months). Significant differences are shown in bold font.
